# Supplementary material for: Nonpharmaceutical interventions to prevent viral respiratory infection in community settings: an umbrella review
Source: PubMed Central journal article supplement — ERJ Open Res. 2022 May 30;8(2):00650-2021. doi: 10.1183/23120541.00650-2021 (PMC9149389; doi:10.1183/23120541.00650-2021), 2022-05-30
Supplement: 00650-2021.SUPPLEMENT.pdf [file 00650-2021.SUPPLEMENT.pdf]

## Supplemental Data

### Search Strategy

#### Embase

(exp 'influenza'/ OR Influenza.ti,ab OR exp 'Respiratory Tract Disease'/ OR Influenzas.ti,ab OR Influenza like.ti,ab OR ILI.ti,ab OR Flu.ti,ab OR Flus.ti,ab OR de 'Common Cold'/ OR "common cold".ti,ab OR colds.ti,ab OR coryza.ti,ab OR exp 'coronavirus'/ OR exp 'SARS coronavirus'/ OR coronavirus.ti,ab OR Coronaviruses.ti,ab OR exp 'coronavirus infection'/ OR exp 'severe acute respiratory syndrome'/ OR "severe acute respiratory syndrome".ti,ab OR "severe acute respiratory syndromes".ti,ab OR sars.ti,ab OR exp 'Pneumovirus'/ OR exp 'Human respiratory syncytial virus'/ OR "respiratory syncytial virus".ti,ab OR "respiratory syncytial viruses".ti,ab OR rsv.ti,ab OR parainfluenza.ti,ab OR "Respiratory illness".ti,ab OR ((Transmission) AND (Coughing OR Sneezing)) OR ((respiratory.ti,ab AND Tract) AND (infection.ti,ab OR Infections.ti,ab OR illness.ti,ab)))

AND

(exp 'hand washing'/ OR handwashing.ti,ab OR hand washing.ti,ab OR ((Hand.ti,ab OR Alcohol.ti,ab) AND (wash.ti,ab OR Washing.ti,ab OR Cleansing.ti,ab OR Rinses.ti,ab OR hygiene.ti,ab OR rub.ti,ab OR Rubbing.ti,ab OR sanitizer.ti,ab OR sanitiser.ti,ab OR cleanser.ti,ab OR disinfected.ti,ab OR Disinfectant.ti,ab OR Disinfect.ti,ab OR antiseptic.ti,ab OR virucid.ti,ab)) OR exp 'protective glove'/ OR Glove.ti,ab OR Gloves.ti,ab OR exp 'mask'/ OR exp 'gas mask'/ OR facemask.ti,ab OR Facemasks.ti,ab OR mask.ti,ab OR Masks.ti,ab OR respirator.ti,ab OR respirators.ti,ab OR de 'protective clothing'/ OR exp 'protective equipment'/ OR "patient isolation".ti,ab OR ((school.ti,ab OR Schools.ti,ab) AND (Closure.ti,ab OR Closures.ti,ab OR Closed.ti,ab)) OR exp 'Quarantine'/ OR quarantine.ti,ab OR "Hygiene intervention".ti,ab OR exp 'mouthwash'/ OR gargling.ti,ab OR "nasal tissues".ti,ab OR exp 'eye protective device'/ OR Glasses.ti,ab OR Goggle.ti,ab OR "Eye protection".ti,ab OR Faceshield.ti,ab OR Faceshields.ti,ab OR Goggles.ti,ab OR "Face shield".ti,ab OR "Face shields".ti,ab OR Visors.ti,ab OR "physical distancing".ti,ab OR "social isolation".ti,ab OR "social distancing".ti,ab OR "physical intervention".ti,ab OR "non-pharmaceutical".ti,ab OR "non pharmaceutical".ti,ab OR N95.ti,ab OR ffp.ti,ab OR ffp1.ti,ab OR ffp3.ti,ab OR ffp2.ti,ab OR N97.ti,ab OR N99.ti,ab OR PPE)

AND

(exp 'meta analysis'/ OR exp 'systematic review'/ OR (meta ADJ3 analy\*).ab,ti OR metaanaly\*.ab,ti OR review\*.ti OR overview\*.ti OR (synthes\* ADJ3 (literature\* OR research\* OR studies OR data)).ab,ti OR (pooled AND analys\*.ab,ti) OR ((data ADJ2 pool\*).ab,ti AND studies.ab,ti) OR medline.ab,ti OR medlars.ab,ti OR embase.ab,ti OR cinahl.ab,ti OR scisearch.ab,ti OR psychinfo.ab,ti OR psycinfo.ab,ti OR psychlit.ab,ti OR psyclit.ab,ti OR cinhal.ab,ti OR cancerlit.ab,ti OR cochrane.ab,ti OR bids.ab,ti OR pubmed.ab,ti OR ovid.ab,ti OR ((hand OR manual OR database\* OR computer\*) ADJ2 search\*).ab,ti OR (electronic ADJ2 (database\* OR 'data base' OR 'data bases')).ab,ti OR bibliograph\*.ab OR 'relevant journals'.ab OR ((review\* OR overview\*) ADJ10 (systematic\* OR methodologic\* OR quantitativ\* OR research\* OR literature\* OR studies OR trial\* OR effective\*)).ab NOT (((retrospective\* OR record\* OR case\* OR patient\*) ADJ2 review\*).ab,ti OR ((patient\* OR review\*) ADJ2 chart\*).ab,ti

OR rat.ab,ti OR rats.ab,ti OR mouse.ab,ti OR mice.ab,ti OR hamster.ab,ti OR hamsters.ab,ti OR animal.ab,ti OR animals.ab,ti OR dog.ab,ti OR dogs.ab,ti OR cat.ab,ti OR cats.ab,ti OR bovine.ab,ti OR sheep.ab,ti) NOT (exp 'editorial'/ OR de 'erratum'/ OR exp 'letter'/) NOT (exp 'animal'/ OR exp 'nonhuman'/ NOT (exp 'animal'/ OR exp 'nonhuman'/ AND exp 'human'/))

## Pubmed

("Influenza, Human"[Mesh] OR "Influenzavirus A"[Mesh] OR "Influenzavirus B"[Mesh] OR "Influenzavirus C"[Mesh] OR Influenza[tiab] OR "Respiratory Tract Diseases"[Mesh] OR "Bacterial Infections/transmission"[Mesh] OR Influenzas[tiab] OR "Influenza- like"[tiab] OR ILI[tiab] OR Flu[tiab] OR Flus[tiab] OR "Common Cold"[Mesh:NoExp] OR "common cold"[tiab] OR colds[tiab] OR coryza[tiab] OR coronavirus[Mesh] OR "sars virus"[Mesh] OR coronavirus[tiab] OR Coronaviruses[tiab] OR "coronavirus infections"[Mesh] OR "severe acute respiratory syndrome"[Mesh] OR "severe acute respiratory syndrome"[tiab] OR "severe acute respiratory syndromes"[tiab] OR sars[tiab] OR "respiratory syncytial viruses"[Mesh] OR "respiratory syncytial virus, human"[Mesh] OR "Respiratory Syncytial Virus Infections"[Mesh] OR "respiratory syncytial virus"[tiab] OR "respiratory syncytial viruses"[tiab] OR rsv[tiab] OR parainfluenza[tiab] OR "Respiratory illness"[tiab] OR ((Transmission[tiab]) AND (Coughing[tiab] OR Sneezing[tiab])) OR ((respiratory[tiab] AND Tract[tiab]) AND (infection[tiab] OR Infections[tiab] OR illness[tiab])))

AND

("Hand Hygiene"[Mesh] OR handwashing[tiab] OR hand- washing[tiab] OR ((Hand[tiab] OR Alcohol[tiab]) AND (wash[tiab] OR Washing[tiab] OR Cleansing[tiab] OR Rinses[tiab] OR hygiene[tiab] OR rub[tiab] OR Rubbing[tiab] OR sanitizer[tiab] OR sanitiser[tiab] OR cleanser[tiab] OR disinfected[tiab] OR Disinfectant[tiab] OR Disinfect[tiab] OR antiseptic[tiab] OR virucid[tiab])) OR "gloves, protective"[Mesh] OR Glove[tiab] OR Gloves[tiab] OR Masks[Mesh] OR "respiratory protective devices"[Mesh] OR facemask[tiab] OR Facemasks[tiab] OR mask[tiab] OR Masks[tiab] OR respirator[tiab] OR respirators[tiab] OR "Protective Clothing"[Mesh:NoExp] OR "Protective Devices"[Mesh] OR "patient isolation"[tiab] OR ((school[tiab] OR Schools[tiab]) AND (Closure[tiab] OR Closures[tiab] OR Closed[tiab])) OR Quarantine[Mesh] OR quarantine[tiab] OR "Hygiene intervention"[tiab] OR "Mouthwashes"[Mesh] OR gargling[tiab] OR "nasal tissues"[tiab] OR "Eye Protective Devices"[Mesh] OR Glasses[tiab] OR Goggle[tiab] OR "Eye protection"[tiab] OR Faceshield[tiab] OR Faceshields[tiab] OR Goggles[tiab] OR "Face shield"[tiab] OR "Face shields"[tiab] OR Visors[tiab] OR "physical distancing"[tiab] OR "social isolation"[tiab] OR "social distancing"[tiab] OR "physical intervention"[tiab] OR "non-pharmaceutical"[tiab] OR "non pharmaceutical"[tiab] OR N95[tiab] OR ffp[tiab] OR ffp1[tiab] OR ffp3[tiab] OR ffp2[tiab] OR N97[tiab] OR N99[tiab] OR PPE [tiab])

AND

(systematic[sb] OR meta-analysis[pt] OR meta-analysis as topic[mh] OR meta-analysis[mh] OR meta analy\*[tw] OR metanaly\*[tw] OR metaanaly\*[tw] OR met analy\*[tw] OR integrative research[tiab] OR integrative review\*[tiab] OR integrative overview\*[tiab] OR research integration\*[tiab] OR research overview\*[tiab] OR collaborative review\*[tiab] OR collaborative overview\*[tiab] OR systematic review\*[tiab] OR technology assessment\*[tiab] OR technology overview\*[tiab] OR "Technology Assessment, Biomedical"[mh] OR HTA[tiab] OR HTAs[tiab] OR

comparative efficacy[tiab] OR comparative effectiveness[tiab] OR outcomes research[tiab] OR indirect comparison\*[tiab] OR ((indirect treatment[tiab] OR mixed-treatment[tiab]) AND comparison\*[tiab]) OR Embase\*[tiab] OR Cinahl\*[tiab] OR systematic overview\*[tiab] OR methodological overview\*[tiab] OR methodologic overview\*[tiab] OR methodological review\*[tiab] OR methodologic review\*[tiab] OR quantitative review\*[tiab] OR quantitative overview\*[tiab] OR quantitative syntheses\*[tiab] OR pooled analy\*[tiab] OR Cochrane[tiab] OR Medline[tiab] OR Pubmed[tiab] OR Medlars[tiab] OR handsearch\*[tiab] OR hand search\*[tiab] OR meta-regression\*[tiab] OR metaregression\*[tiab] OR data syntheses\*[tiab] OR data extraction[tiab] OR data abstraction\*[tiab] OR mantel haenszel[tiab] OR peto[tiab] OR dersimonian[tiab] OR dersimonian[tiab] OR fixed effect\*[tiab] OR "Cochrane Database SystRev"[Journal: \_\_jrid21711])

NOT

(Animals[Mesh] NOT (Animals[Mesh] AND Humans[Mesh]))

NOT

("Case Reports"[pt] OR Editorial[pt] OR Letter[pt] OR "Observational Study"[pt] OR "Case Report"[ti] OR "Case series"[ti] OR Randomized controlled trial[pt] OR controlled clinical trial[pt] OR randomized[tiab] OR randomised[tiab] OR placebo[tiab] OR "drug therapy"[sh] OR randomly[tiab] OR trial[tiab] OR groups[tiab])

### **Cochrane Reviews**

([mh "Influenza, Human"] OR [mh "Influenzavirus A"] OR [mh "Influenzavirus B"] OR [mh "Influenzavirus C"] OR Influenza:ti,ab OR [mh "Respiratory Tract Diseases"] OR Influenzas:ti,ab OR "Influenza- like":ti,ab OR ILI:ti,ab OR Flu:ti,ab OR Flus:ti,ab OR [mh "Common Cold"] OR "common cold":ti,ab OR colds:ti,ab OR coryza:ti,ab OR [mh coronavirus] OR [mh "sars virus"] OR coronavirus:ti,ab OR Coronaviruses:ti,ab OR [mh "coronavirus infections"] OR [mh "severe acute respiratory syndrome"] OR "severe acute respiratory syndrome":ti,ab OR "severe acute respiratory syndromes":ti,ab OR sars:ti,ab OR [mh "respiratory syncytial viruses"] OR [mh "respiratory syncytial virus, human"] OR [mh "Respiratory Syncytial Virus Infections"] OR "respiratory syncytial virus":ti,ab OR "respiratory syncytial viruses":ti,ab OR rsv:ti,ab OR parainfluenza:ti,ab OR "Respiratory illness":ti,ab OR ((Transmission) AND (Coughing OR Sneezing)) OR ((respiratory:ti,ab AND Tract) AND (infection:ti,ab OR Infections:ti,ab OR illness:ti,ab)) OR "physical distancing":ti,ab OR "social isolation":ti,ab OR "social distancing":ti,ab OR "physical intervention":ti,ab OR "non-pharmaceutical":ti,ab OR "non pharmaceutical":ti,ab OR N95:ti,ab OR ffp:ti,ab OR ffp1:ti,ab OR ffp3:ti,ab OR ffp2:ti,ab OR N97:ti,ab OR N99:ti,ab OR PPE)

AND

([mh "Hand Hygiene"] OR handwashing:ti,ab OR "hand- washing":ti,ab OR ((Hand:ti,ab OR Alcohol:ti,ab) AND (wash:ti,ab OR Washing:ti,ab OR Cleansing:ti,ab OR Rinses:ti,ab OR hygiene:ti,ab OR rub:ti,ab OR Rubbing:ti,ab OR sanitizer:ti,ab OR sanitiser:ti,ab OR cleanser:ti,ab OR disinfected:ti,ab OR Disinfectant:ti,ab OR Disinfect:ti,ab OR antiseptic:ti,ab OR virucid:ti,ab)) OR [mh "gloves, protective"] OR Glove:ti,ab OR Gloves:ti,ab OR [mh Masks] OR [mh "respiratory protective devices"] OR facemask:ti,ab OR Facemasks:ti,ab OR mask:ti,ab OR Masks:ti,ab OR respirator:ti,ab OR respirators:ti,ab OR [mh "Protective Clothing"] OR [mh

"Protective Devices"] OR "patient isolation":ti,ab OR ((school:ti,ab OR Schools:ti,ab) AND (Closure:ti,ab OR Closures:ti,ab OR Closed:ti,ab)) OR [mh Quarantine] OR quarantine:ti,ab OR "Hygiene intervention":ti,ab OR [mh Mouthwashes] OR gargling:ti,ab OR "nasal tissues":ti,ab OR [mh "Eye Protective Devices"] OR Glasses:ti,ab OR Goggle:ti,ab OR "Eye protection":ti,ab OR Faceshield:ti,ab OR Faceshields:ti,ab OR Goggles:ti,ab OR "Face shield":ti,ab OR "Face shields":ti,ab OR Visors:ti,ab)

AND

([mh "Communicable Disease Control"] OR [mh "Disease Outbreaks"] OR [mh "Disease Transmission, Infectious"] OR [mh "Infection Control"] OR "Communicable Disease Control":ti,ab OR "Secondary transmission":ti,ab OR ((Reduced:ti,ab OR Reduce:ti,ab OR Reduction:ti,ab OR Reducing:ti,ab OR Lower:ti,ab) AND (Incidence:ti,ab OR Occurrence:ti,ab OR Transmission:ti,ab OR Secondary:ti,ab)))

### **CINAHL**

((MH "Influenza, Human+") OR (MH "Orthomyxoviridae+") OR TI Influenza OR AB Influenza OR (MH "Respiratory Tract Diseases+") OR TI Influenzas OR AB Influenzas OR TI Influenza- like OR AB Influenza- like OR TI ILI OR AB ILI OR TI Flu OR AB Flu OR TI Flus OR AB Flus OR (MH "Common Cold+") OR TI "common cold" OR AB "common cold" OR TI colds OR AB colds OR TI coryza OR AB coryza OR (MH "coronavirus+") OR (MH "sars virus+") OR TI coronavirus OR AB coronavirus OR TI Coronaviruses OR AB Coronaviruses OR (MH "coronavirus infections+") OR (MH "severe acute respiratory syndrome+") OR TI "severe acute respiratory syndrome" OR AB "severe acute respiratory syndrome" OR TI "severe acute respiratory syndromes" OR AB "severe acute respiratory syndromes" OR TI sars OR AB sars OR (MH "respiratory syncytial viruses+") OR TI "respiratory syncytial virus" OR AB "respiratory syncytial virus" OR TI "respiratory syncytial viruses" OR AB "respiratory syncytial viruses" OR TI rsv OR AB rsv OR TI parainfluenza OR AB parainfluenza OR TI "Respiratory illness" OR AB "Respiratory illness" OR ((Transmission) AND (Coughing OR Sneezing)) OR ((TI respiratory OR AB respiratory AND Tract) AND (TI infection OR AB infection OR TI Infections OR AB Infections OR TI illness OR AB illness)))

AND

((MH "Handwashing+") OR TI handwashing OR AB handwashing OR TI hand- washing OR AB hand- washing OR ((TI Hand OR AB Hand OR TI Alcohol OR AB Alcohol) AND (TI wash OR AB wash OR TI Washing OR AB Washing OR TI Cleansing OR AB Cleansing OR TI Rinses OR AB Rinses OR TI hygiene OR AB hygiene OR TI rub OR AB rub OR TI Rubbing OR AB Rubbing OR TI sanitizer OR AB sanitiser OR TI sanitizer OR AB sanitiser OR TI cleanser OR AB cleanser OR TI disinfected OR AB disinfected OR TI Disinfectant OR AB Disinfectant OR TI Disinfect OR AB Disinfect OR TI antiseptic OR AB antiseptic OR TI virucid OR AB virucid)) OR (MH "gloves+") OR TI Glove OR AB Glove OR Gloves OR (MH "Masks+") OR (MH "respiratory protective devices+") OR TI facemask OR AB facemask OR TI Facemasks OR AB Facemasks OR TI mask OR AB mask OR TI Masks OR AB Masks OR TI respirator OR AB respirator OR TI respirators OR AB respirators OR (MH "Protective Clothing") OR (MH "Protective Devices+") OR TI "patient isolation" OR AB "patient isolation" OR ((TI school OR AB school OR TI Schools OR AB Schools) AND (TI Closure OR AB Closure OR TI Closures OR AB Closures OR TI Closed OR AB Closed)) OR (MH "Quarantine+") OR TI quarantine OR AB quarantine OR TI

"Hygiene intervention" OR AB "Hygiene intervention" OR (MH "Mouthwashes+") OR TI gargling OR AB gargling OR TI "nasal tissues" OR AB "nasal tissues" OR (MH "Eye Protective Devices+") OR TI Glasses OR AB Glasses OR TI Goggle OR AB Goggle OR TI "Eye protection" OR AB "Eye protection" OR TI Faceshield OR AB Faceshield OR TI Faceshields OR AB Faceshields OR TI Goggles OR AB Goggles OR TI "Face shield" OR AB "Face shield" OR TI "Face shields" OR AB "Face shields" OR TI Visors OR AB Visors OR TI "physical distancing" OR AB "physical distancing" OR TI "social isolation" OR AB "social isolation" OR TI "social distancing" OR AB "social distancing" OR TI "physical intervention" OR AB "physical intervention" OR TI "non-pharmaceutical" OR AB "non-pharmaceutical" OR TI "non pharmaceutical" OR AB "non pharmaceutical" OR TI N95 OR AB N95 OR TI ffp OR AB ffp OR TI ffp1 OR AB ffp1 OR TI ffp3 OR AB ffp3 OR TI ffp2 OR AB ffp2 OR TI N97 OR AB N97 OR TI N99 OR AB N99 OR TI PPE OR AB PPE)

AND

((MH "Infection Control+") OR (MH "Disease Outbreaks+") OR (MH "Infection Control+") OR TI "Communicable Disease Control" OR AB "Communicable Disease Control" OR TI "Secondary transmission" OR AB "Secondary transmission" OR ((TI Reduced OR AB Reduced OR TI Reduce OR AB Reduce OR TI Reduction OR AB Reduction OR TI Reducing OR AB Reducing OR TI Lower OR AB Lower) AND (TI Incidence OR AB Incidence OR TI Occurrence OR AB Occurrence OR TI Transmission OR AB Transmission OR TI Secondary OR AB Secondary))))

AND

((MH "Meta Analysis") OR TI meta analys\* OR AB meta analys\* OR TI Metaanaly\* OR AB metaanalys\* OR (MH "Literature Review+") OR TI systematic review\* OR AB systematic review\* OR TI systematic overview\* OR AB systematic overview\* NOT (PT commentary OR PT letter OR PT editorial OR MH animals+))

**Supplemental Table 1.** Excluded studies and respective reasons

| <b>Study</b>           | <b>Notes</b>                               |
|------------------------|--------------------------------------------|
| Uchida 2013            | Exclusion reason: Wrong patient population |
| Jefferson 2009         | Exclusion reason: Companion Report         |
| Halton 2013            | Exclusion reason: Wrong patient population |
| Jackson 2013           | Exclusion reason: Wrong outcomes           |
| Dugre 2020             | Exclusion reason: Wrong study design       |
| Sharma 2020            | Exclusion reason: Wrong patient population |
| Coclite 2020           | Exclusion reason: Published 2021           |
| Ahmed 2018             | Exclusion reason: Wrong outcomes           |
| Ide 2016               | Exclusion reason: Wrong patient population |
| Chaabna 2020           | Exclusion reason: Published 2021           |
| Serra 2014             | Exclusion reason: Wrong outcomes           |
| Saunders-Hastings 2017 | Exclusion reason: Wrong patient population |
| Barasheed 2016         | Exclusion reason: Wrong patient population |
| Cascini 2020           | Exclusion reason: Wrong outcomes;          |
| Fricke 2021            | Exclusion reason: Published 2021           |
| Zivich 2018            | Exclusion reason: Wrong outcomes           |
| bin-Reza 2012          | Exclusion reason: Wrong patient population |
| Ryu 2020               | Exclusion reason: Wrong outcomes           |
| Chu 2020               | Exclusion reason: Duplicate                |
| Alqahtani 2020         | Exclusion reason: Can't get access         |
| Viner 2020             | Exclusion reason: Wrong outcomes           |
| Sjogren 2008           | Exclusion reason: Wrong outcomes           |
| Shi 2020               | Exclusion reason: Wrong outcomes           |
| Saunders-Hastings 2016 | Exclusion reason: Wrong study design       |
| Nussbaumer-Streit 2020 | Exclusion reason: Wrong study design       |
| Nussbaumer-Streit 2020 | Exclusion reason: Wrong study design       |
| Long 2020              | Exclusion reason: Wrong patient population |
| Liu 2018               | Exclusion reason: Wrong outcomes           |
| Girum 2020             | Exclusion reason: Wrong study design       |
| Chughtai 2019          | Exclusion reason: Wrong outcomes           |
| Chughtai 2020          | Exclusion reason: Wrong outcomes           |
| Chetty 2020            | Exclusion reason: Wrong study design       |
| Burns 2020             | Exclusion reason: Wrong study design       |
| Camargo 2020           | Exclusion reason: Non-English Article      |
| Burns 2020             | Exclusion reason: Companion Report         |
| Braithwaite 2020       | Exclusion reason: Wrong study design       |
| BinNafisah 2018        | Exclusion reason: Wrong study design       |

|                       |                                            |
|-----------------------|--------------------------------------------|
| Beaudry 2020          | Exclusion reason: Wrong outcomes           |
| Lahiri 2020           | Exclusion reason: Wrong study design       |
| Koh 2020              | Exclusion reason: Wrong intervention       |
| Halton 2012           | Exclusion reason: Wrong study design       |
| Gralton 2010          | Exclusion reason: Wrong patient population |
| Joshi 2013            | Exclusion reason: Wrong study design       |
| Jessop 2020           | Exclusion reason: Wrong patient population |
| Jefferson 2008        | Exclusion reason: Companion Report         |
| Jefferson 2010        | Exclusion reason: Companion Report         |
| Jefferson 2011        | Exclusion reason: Companion Report         |
| Ortega 2020           | Exclusion reason: Wrong intervention       |
| Taminato 2020         | Exclusion reason: Wrong patient population |
| Solia 2020            | Exclusion reason: Wrong study design       |
| Shimabukuro 2020      | Exclusion reason: Wrong setting            |
| Shah 2020             | Exclusion reason: Wrong intervention       |
| Serra 2014            | Exclusion reason: Non-English Article      |
| Santos 2020           | Exclusion reason: Wrong intervention       |
| Rowbotham 2019        | Exclusion reason: Wrong outcomes           |
| Moradali 2020         | Exclusion reason: Wrong outcomes           |
| Mayr 2020             | Exclusion reason: Non-English Article      |
| Marasinghe 2020       | Exclusion reason: Wrong outcomes           |
| Lee 2020              | Exclusion reason: Wrong intervention       |
| Lakhani 2020          | Exclusion reason: Wrong study design       |
| Gholami 2021          | Exclusion reason: Wrong patient population |
| French 2016           | Exclusion reason: Wrong patient population |
| Burton 2020           | Exclusion reason: Wrong intervention       |
| Bulfone 2020          | Exclusion reason: Wrong intervention       |
| Brankston 2007        | Exclusion reason: Wrong study design       |
| Bo≈koski 2020         | Exclusion reason: Wrong study design       |
| Barycka 2020          | Exclusion reason: Wrong patient population |
| Bartoszko 2020        | Exclusion reason: Wrong patient population |
| Barbato 2020          | Exclusion reason: Wrong patient population |
| Aboelela 2006         | Exclusion reason: Wrong patient population |
| OlrydeLabry-Lima 2020 | Exclusion reason: Wrong study design       |
| Benkouiten 2014       | Exclusion reason: Wrong study design       |
| Zhen 2020             | Exclusion reason: Wrong study design       |
| Yin 2021              | Exclusion reason: Wrong patient population |
| Xiang 2021            | Exclusion reason: Wrong study design       |
| Wang 2019             | Exclusion reason: Wrong patient population |

|                        |                                            |
|------------------------|--------------------------------------------|
| Violante 2020          | Exclusion reason: Wrong study design       |
| Verbeek 2019           | Exclusion reason: Wrong patient population |
| urRahman 2018          | Exclusion reason: Wrong patient population |
| Tran 2012              | Exclusion reason: Wrong patient population |
| Tian 2021              | Exclusion reason: Wrong patient population |
| Tian 2020              | Exclusion reason: Wrong patient population |
| Tabatabaeizadeh 2021   | Exclusion reason: Wrong patient population |
| Thomas 2017            | Exclusion reason: Wrong study design       |
| Smith 2016             | Exclusion reason: Wrong patient population |
| Sharma 2019            | Exclusion reason: Wrong study design       |
| Schmidt 2020           | Exclusion reason: Wrong study design       |
| Samaranayake 2020      | Exclusion reason: Wrong patient population |
| Ryan 2020              | Exclusion reason: Wrong study design       |
| Ryan 2020              | Exclusion reason: Wrong study design       |
| Rios 2020              | Exclusion reason: Wrong outcomes           |
| Rashid 2015            | Exclusion reason: Wrong study design       |
| Rahimi 2020            | Exclusion reason: Wrong outcomes           |
| Patel 2020             | Exclusion reason: Wrong outcomes           |
| Pasquini-Descomps 2017 | Exclusion reason: Wrong outcomes           |
| Paludan-MVøller 2020   | Exclusion reason: Wrong outcomes           |
| Offeddu 2017           | Exclusion reason: Wrong patient population |
| Noorimotlagh 2021      | Exclusion reason: Wrong outcomes           |
| Mhango 2020            | Exclusion reason: Wrong patient population |
| Mbakaya 2020           | Exclusion reason: Wrong outcomes           |
| Li 2020                | Exclusion reason: Wrong patient population |
| Lee 2009               | Exclusion reason: Wrong study design       |
| Lee 2005               | Exclusion reason: Wrong study design       |
| Lahiri 2020            | Exclusion reason: Wrong study design       |
| Kwok 2019              | Exclusion reason: Wrong study design       |
| Krishnaratne 2020      | Exclusion reason: Wrong study design       |
| Johanna 2020           | Exclusion reason: Wrong study design       |
| Jefferson 2007         | Exclusion reason: Companion Report         |
| Jefferson 2010         | Exclusion reason: Companion Report         |
| Jain 2020              | Exclusion reason: Wrong study design       |
| Jackson 2014           | Exclusion reason: Wrong study design       |
| Iannone 2020           | Exclusion reason: Wrong patient population |
| Hopman 2019            | Exclusion reason: Wrong study design       |
| GarciaGodoy 2020       | Exclusion reason: Wrong study design       |
| FouladiDehaghi 2020    | Exclusion reason: Wrong patient population |

|               |                                            |
|---------------|--------------------------------------------|
| Daryai 2020   | Exclusion reason: Wrong study design       |
| Burton 2020   | Exclusion reason: Wrong patient population |
| Burton 2020   | Exclusion reason: Wrong patient population |
| Arefi 2020    | Exclusion reason: Wrong study design       |
| Amaechi 2020  | Exclusion reason: Wrong study design       |
| Brainard 2020 | Exclusion reason: Wrong study design       |
| Aledort 2007  | Exclusion reason: Wrong study design       |

## Supplemental Table 2. PRISMA 2020 Checklist

| Section and Topic             | Item # | Checklist item                                                                                                                                                                                                                                                                                       | Location where item is reported |
|-------------------------------|--------|------------------------------------------------------------------------------------------------------------------------------------------------------------------------------------------------------------------------------------------------------------------------------------------------------|---------------------------------|
| <b>TITLE</b>                  |        |                                                                                                                                                                                                                                                                                                      |                                 |
| Title                         | 1      | Identify the report as a systematic review.                                                                                                                                                                                                                                                          | Lines 2, 59-61                  |
| <b>ABSTRACT</b>               |        |                                                                                                                                                                                                                                                                                                      |                                 |
| Abstract                      | 2      | See the PRISMA 2020 for Abstracts checklist.                                                                                                                                                                                                                                                         | Page 2                          |
| <b>INTRODUCTION</b>           |        |                                                                                                                                                                                                                                                                                                      |                                 |
| Rationale                     | 3      | Describe the rationale for the review in the context of existing knowledge.                                                                                                                                                                                                                          | Lines 52-60                     |
| Objectives                    | 4      | Provide an explicit statement of the objective(s) or question(s) the review addresses.                                                                                                                                                                                                               | Lines 65-68                     |
| <b>METHODS</b>                |        |                                                                                                                                                                                                                                                                                                      |                                 |
| Eligibility criteria          | 5      | Specify the inclusion and exclusion criteria for the review and how studies were grouped for the syntheses.                                                                                                                                                                                          | Lines 99-125                    |
| Information sources           | 6      | Specify all databases, registers, websites, organisations, reference lists and other sources searched or consulted to identify studies. Specify the date when each source was last searched or consulted.                                                                                            | Lines 89-96                     |
| Search strategy               | 7      | Present the full search strategies for all databases, registers and websites, including any filters and limits used.                                                                                                                                                                                 | Supplemental Data               |
| Selection process             | 8      | Specify the methods used to decide whether a study met the inclusion criteria of the review, including how many reviewers screened each record and each report retrieved, whether they worked independently, and if applicable, details of automation tools used in the process.                     | Lines 83-129                    |
| Data collection process       | 9      | Specify the methods used to collect data from reports, including how many reviewers collected data from each report, whether they worked independently, any processes for obtaining or confirming data from study investigators, and if applicable, details of automation tools used in the process. | Lines 129-146                   |
| Data items                    | 10a    | List and define all outcomes for which data were sought. Specify whether all results that were compatible with each outcome domain in each study were sought (e.g. for all measures, time points, analyses), and if not, the methods used to decide which results to collect.                        | Lines 139-141                   |
|                               | 10b    | List and define all other variables for which data were sought (e.g. participant and intervention characteristics, funding sources). Describe any assumptions made about any missing or unclear information.                                                                                         | Lines 136-146                   |
| Study risk of bias assessment | 11     | Specify the methods used to assess risk of bias in the included studies, including details of the tool(s) used, how many reviewers assessed each study and whether they worked independently, and if applicable, details of automation tools used in the process.                                    | Lines 149-160                   |
| Effect measures               | 12     | Specify for each outcome the effect measure(s) (e.g. risk ratio, mean difference) used in the synthesis or presentation of results.                                                                                                                                                                  | Lines 163-168                   |
| Synthesis methods             | 13a    | Describe the processes used to decide which studies were eligible for each synthesis (e.g. tabulating the study intervention characteristics and comparing against the planned groups for each synthesis (item #5)).                                                                                 | n/a                             |
|                               | 13b    | Describe any methods required to prepare the data for presentation or synthesis, such as handling of missing summary statistics, or data conversions.                                                                                                                                                | n/a                             |
|                               | 13c    | Describe any methods used to tabulate or visually display results of individual studies and syntheses.                                                                                                                                                                                               | Line 163-165                    |
|                               | 13d    | Describe any methods used to synthesize results and provide a rationale for the choice(s). If meta-analysis was performed, describe                                                                                                                                                                  | Lines 163-                      |

| Section and Topic             | Item # | Checklist item                                                                                                                                                                                                                                                                       | Location where item is reported     |
|-------------------------------|--------|--------------------------------------------------------------------------------------------------------------------------------------------------------------------------------------------------------------------------------------------------------------------------------------|-------------------------------------|
|                               |        | the model(s), method(s) to identify the presence and extent of statistical heterogeneity, and software package(s) used.                                                                                                                                                              | 168                                 |
|                               | 13e    | Describe any methods used to explore possible causes of heterogeneity among study results (e.g. subgroup analysis, meta-regression).                                                                                                                                                 | n/a                                 |
|                               | 13f    | Describe any sensitivity analyses conducted to assess robustness of the synthesized results.                                                                                                                                                                                         | n/a                                 |
| Reporting bias assessment     | 14     | Describe any methods used to assess risk of bias due to missing results in a synthesis (arising from reporting biases).                                                                                                                                                              | n/a                                 |
| Certainty assessment          | 15     | Describe any methods used to assess certainty (or confidence) in the body of evidence for an outcome.                                                                                                                                                                                | n/a                                 |
| <b>RESULTS</b>                |        |                                                                                                                                                                                                                                                                                      |                                     |
| Study selection               | 16a    | Describe the results of the search and selection process, from the number of records identified in the search to the number of studies included in the review, ideally using a flow diagram.                                                                                         | Lines 175-180                       |
|                               | 16b    | Cite studies that might appear to meet the inclusion criteria, but which were excluded, and explain why they were excluded.                                                                                                                                                          | Supplemental table 1                |
| Study characteristics         | 17     | Cite each included study and present its characteristics.                                                                                                                                                                                                                            | Table 2-4                           |
| Risk of bias in studies       | 18     | Present assessments of risk of bias for each included study.                                                                                                                                                                                                                         | Supplemental table 3                |
| Results of individual studies | 19     | For all outcomes, present, for each study: (a) summary statistics for each group (where appropriate) and (b) an effect estimate and its precision (e.g. confidence/credible interval), ideally using structured tables or plots.                                                     | Table 2-4                           |
| Results of syntheses          | 20a    | For each synthesis, briefly summarise the characteristics and risk of bias among contributing studies.                                                                                                                                                                               | Tables 2-4 and Supplemental Table 3 |
|                               | 20b    | Present results of all statistical syntheses conducted. If meta-analysis was done, present for each the summary estimate and its precision (e.g. confidence/credible interval) and measures of statistical heterogeneity. If comparing groups, describe the direction of the effect. | n/a                                 |
|                               | 20c    | Present results of all investigations of possible causes of heterogeneity among study results.                                                                                                                                                                                       | n/a                                 |
|                               | 20d    | Present results of all sensitivity analyses conducted to assess the robustness of the synthesized results.                                                                                                                                                                           | n/a                                 |
| Reporting biases              | 21     | Present assessments of risk of bias due to missing results (arising from reporting biases) for each synthesis assessed.                                                                                                                                                              | n/a                                 |
| Certainty of evidence         | 22     | Present assessments of certainty (or confidence) in the body of evidence for each outcome assessed.                                                                                                                                                                                  | n/a                                 |
| <b>DISCUSSION</b>             |        |                                                                                                                                                                                                                                                                                      |                                     |
| Discussion                    | 23a    | Provide a general interpretation of the results in the context of other evidence.                                                                                                                                                                                                    | Lines 314-323                       |
|                               | 23b    | Discuss any limitations of the evidence included in the review.                                                                                                                                                                                                                      | Lines 354-356                       |
|                               | 23c    | Discuss any limitations of the review processes used.                                                                                                                                                                                                                                | Lines 356-359                       |

| Section and Topic                              | Item # | Checklist item                                                                                                                                                                                                                             | Location where item is reported |
|------------------------------------------------|--------|--------------------------------------------------------------------------------------------------------------------------------------------------------------------------------------------------------------------------------------------|---------------------------------|
|                                                | 23d    | Discuss implications of the results for practice, policy, and future research.                                                                                                                                                             | Lines 364-370                   |
| <b>OTHER INFORMATION</b>                       |        |                                                                                                                                                                                                                                            |                                 |
| Registration and protocol                      | 24a    | Provide registration information for the review, including register name and registration number, or state that the review was not registered.                                                                                             | Line 404                        |
|                                                | 24b    | Indicate where the review protocol can be accessed, or state that a protocol was not prepared.                                                                                                                                             | n/a                             |
|                                                | 24c    | Describe and explain any amendments to information provided at registration or in the protocol.                                                                                                                                            | n/a                             |
| Support                                        | 25     | Describe sources of financial or non-financial support for the review, and the role of the funders or sponsors in the review.                                                                                                              | Line 400                        |
| Competing interests                            | 26     | Declare any competing interests of review authors.                                                                                                                                                                                         | Lines 398                       |
| Availability of data, code and other materials | 27     | Report which of the following are publicly available and where they can be found: template data collection forms; data extracted from included studies; data used for all analyses; analytic code; any other materials used in the review. | Lines 400                       |

**Supplemental Table 3. AMSTAR GRADING**

| CRITERIA #                 | 1                                                                                                       | 2                                                                                                                                                                                                                      | 3                                                                                                       | 4                                                                             | 5                                                           | 6                                                                   |
|----------------------------|---------------------------------------------------------------------------------------------------------|------------------------------------------------------------------------------------------------------------------------------------------------------------------------------------------------------------------------|---------------------------------------------------------------------------------------------------------|-------------------------------------------------------------------------------|-------------------------------------------------------------|---------------------------------------------------------------------|
| <b>STUDY (ID#)</b>         | <b>Did the research questions and inclusion criteria for the review include the components of PICO?</b> | <b>Did the report of the review contain an explicit statement that the review methods were established prior to the conduct of the review and did the report justify and significant deviations from the protocol?</b> | <b>Did the review authors explain their selection of the study designs for inclusion in the review?</b> | <b>Did the review authors use a comprehensive literature search strategy?</b> | <b>Did the authors perform study selection in duplicate</b> | <b>Did the review authors perform data extraction in duplicate?</b> |
| Chu 2020 (1)               | YES                                                                                                     | YES                                                                                                                                                                                                                    | NO                                                                                                      | YES                                                                           | YES                                                         | YES                                                                 |
| Jefferson 2020 (2)         | YES                                                                                                     | YES                                                                                                                                                                                                                    | YES                                                                                                     | YES                                                                           | YES                                                         | YES                                                                 |
| Aggarwal 2020 (3)          | YES                                                                                                     | NO                                                                                                                                                                                                                     | NO                                                                                                      | PARTIAL YES                                                                   | YES                                                         | YES                                                                 |
| Gera 2018 (4)              | YES                                                                                                     | YES                                                                                                                                                                                                                    | YES                                                                                                     | YES                                                                           | YES                                                         | YES                                                                 |
| Rabie 2006 (5)             | YES                                                                                                     | NO                                                                                                                                                                                                                     | NO                                                                                                      | PARTIAL YES                                                                   | YES                                                         | YES                                                                 |
| Wang 2020 (6)              | YES                                                                                                     | NO                                                                                                                                                                                                                     | YES                                                                                                     | PARTIAL YES                                                                   | YES                                                         | YES                                                                 |
| Wong 2014 (7)              | YES                                                                                                     | NO                                                                                                                                                                                                                     | NO                                                                                                      | PARTIAL YES                                                                   | YES                                                         | YES                                                                 |
| Abdullahi 2020 (8)         | YES                                                                                                     | YES                                                                                                                                                                                                                    | NO                                                                                                      | PARTIAL YES                                                                   | YES                                                         | YES                                                                 |
| Liang 2020 (9)             | YES                                                                                                     | NO                                                                                                                                                                                                                     | NO                                                                                                      | PARTIAL YES                                                                   | YES                                                         | YES                                                                 |
| Xiao 2020 (10)             | YES                                                                                                     | NO                                                                                                                                                                                                                     | YES                                                                                                     | PARTIAL YES                                                                   | YES                                                         | YES                                                                 |
| Rainwater-Lovett 2014 (11) | YES                                                                                                     | NO                                                                                                                                                                                                                     | NO                                                                                                      | NO                                                                            | YES                                                         | NO                                                                  |
| Chou 2020 (12)             | YES                                                                                                     | NO                                                                                                                                                                                                                     | YES                                                                                                     | YES                                                                           | NO                                                          | NO                                                                  |
| McGuinness 2018 (13)       | YES                                                                                                     | YES                                                                                                                                                                                                                    | NO                                                                                                      | YES                                                                           | YES                                                         | YES                                                                 |
| Moncion 2019 (14)          | YES                                                                                                     | PARTIAL YES                                                                                                                                                                                                            | NO                                                                                                      | PARTIAL YES                                                                   | YES                                                         | YES                                                                 |
| Smith 2015 (15)            | YES                                                                                                     | NO                                                                                                                                                                                                                     | NO                                                                                                      | YES                                                                           | YES                                                         | YES                                                                 |
| Wang 2017 (16)             | YES                                                                                                     | NO                                                                                                                                                                                                                     | NO                                                                                                      | PARTIAL YES                                                                   | NO                                                          | NO                                                                  |
| Warren-Galsh 2013 (17)     | YES                                                                                                     | NO                                                                                                                                                                                                                     | NO                                                                                                      | PARTIAL YES                                                                   | YES                                                         | YES                                                                 |
| Willmott 2016 (18)         | YES                                                                                                     | PARTIAL YES                                                                                                                                                                                                            | NO                                                                                                      | PARTIAL YES                                                                   | NO                                                          | YES                                                                 |
| Mbakaya 2017 (19)          | YES                                                                                                     | NO                                                                                                                                                                                                                     | NO                                                                                                      | PARTIAL YES                                                                   | YES                                                         | NO                                                                  |
| Cowling 2010 (20)          | YES                                                                                                     | NO                                                                                                                                                                                                                     | NO                                                                                                      | PARTIAL YES                                                                   | YES                                                         | YES                                                                 |
| Fong 2020 (21)             | YES                                                                                                     | NO                                                                                                                                                                                                                     | YES                                                                                                     | PARTIAL YES                                                                   | YES                                                         | NO                                                                  |
| MacIntyre 2020 (22)        | YES                                                                                                     | NO                                                                                                                                                                                                                     | NO                                                                                                      | PARTIAL YES                                                                   | YES                                                         | NO                                                                  |
| Singh 2020 (23)            | YES                                                                                                     | NO                                                                                                                                                                                                                     | NO                                                                                                      | PARTIAL YES                                                                   | NO                                                          | NO                                                                  |
| Aeillo 2008 (24)           | YES                                                                                                     | NO                                                                                                                                                                                                                     | NO                                                                                                      | PARTIAL YES                                                                   | YES                                                         | YES                                                                 |

|          | 7                                                                                     | 8                                                                        | 9                                                                                                                                                      |                                               | 10                                                                                              | 11                                                                                                                    |                                               | 12                                                                                                                                                                               |
|----------|---------------------------------------------------------------------------------------|--------------------------------------------------------------------------|--------------------------------------------------------------------------------------------------------------------------------------------------------|-----------------------------------------------|-------------------------------------------------------------------------------------------------|-----------------------------------------------------------------------------------------------------------------------|-----------------------------------------------|----------------------------------------------------------------------------------------------------------------------------------------------------------------------------------|
| Study ID | Did the review authors provide a list of excluded studies and justify the exclusions? | Did the review authors describe the included studies in adequate detail? | Did the review authors use a satisfactory technique for assessing the risk of bias (RoB) in individual studies that were included in the review? (RCT) | Non-randomized studies of intervention (NRSI) | Did the review authors report on the sources of funding for the studies included in the review? | If meta-analysis was performed did the review authors use appropriate methods for statistical combination of results? | Non-randomized studies of intervention (NRSI) | If meta-analysis was performed, did the review authors assess the potential impact of RoB in individual studies on the results of the meta-analysis or other evidence synthesis? |
| 1        | NO                                                                                    | YES                                                                      | Only NRSI                                                                                                                                              | YES                                           | NO                                                                                              | N/A                                                                                                                   | YES                                           | N/A                                                                                                                                                                              |
| 2        | YES                                                                                   | YES                                                                      | YES                                                                                                                                                    | N/A                                           | YES                                                                                             | YES                                                                                                                   | N/A                                           | YES                                                                                                                                                                              |
| 3        | NO                                                                                    | YES                                                                      | YES                                                                                                                                                    | N/A                                           | YES                                                                                             | YES                                                                                                                   | N/A                                           | YES                                                                                                                                                                              |
| 4        | NO                                                                                    | PARTIAL YES                                                              | YES                                                                                                                                                    | YES                                           | NO                                                                                              | YES                                                                                                                   | N/A                                           | NO                                                                                                                                                                               |
| 5        | YES                                                                                   | YES                                                                      | NO                                                                                                                                                     | NO                                            | NO                                                                                              | NO                                                                                                                    | NO                                            | YES                                                                                                                                                                              |
| 6        | NO                                                                                    | YES                                                                      | YES                                                                                                                                                    | YES                                           | NO                                                                                              | N/A                                                                                                                   | YES                                           | NO                                                                                                                                                                               |
| 7        | YES                                                                                   | PARTIAL YES                                                              | YES                                                                                                                                                    | N/A                                           | YES                                                                                             | YES                                                                                                                   | N/A                                           | YES                                                                                                                                                                              |
| 8        | NO                                                                                    | PARTIAL YES                                                              | YES                                                                                                                                                    | YES                                           | NO                                                                                              | NO                                                                                                                    | YES                                           | NO                                                                                                                                                                               |
| 9        | NO                                                                                    | PARTIAL YES                                                              | PARTIAL YES                                                                                                                                            | YES                                           | NO                                                                                              | YES                                                                                                                   | YES                                           | YES                                                                                                                                                                              |
| 10       | NO                                                                                    | YES                                                                      | YES                                                                                                                                                    | N/a                                           | NO                                                                                              | YES                                                                                                                   | N/A                                           | YES                                                                                                                                                                              |
| 11       | NO                                                                                    | NO                                                                       | NO                                                                                                                                                     | NO                                            | NO                                                                                              | NO                                                                                                                    | NO                                            | NO                                                                                                                                                                               |
| 12       | NO                                                                                    | YES                                                                      | YES                                                                                                                                                    | YES                                           | NO                                                                                              | N/A                                                                                                                   | N/A                                           | N/A                                                                                                                                                                              |
| 13       | NO                                                                                    | YES                                                                      | YES                                                                                                                                                    | N/A                                           | YES                                                                                             | N/A                                                                                                                   | N/A                                           | N/A                                                                                                                                                                              |
| 14       | NO                                                                                    | PARTIAL YES                                                              | YES                                                                                                                                                    | YES                                           | NO                                                                                              | N/A                                                                                                                   | N/A                                           | N/A                                                                                                                                                                              |
| 15       | YES                                                                                   | YES                                                                      | YES                                                                                                                                                    | N/A                                           | NO                                                                                              | N/A                                                                                                                   | N/A                                           | N/A                                                                                                                                                                              |
| 16       | NO                                                                                    | PARTIAL YES                                                              | YES                                                                                                                                                    | YES                                           | NO                                                                                              | N/A                                                                                                                   | N/A                                           | N/A                                                                                                                                                                              |
| 17       | NO                                                                                    | YES                                                                      | YES                                                                                                                                                    | YES                                           | NO                                                                                              | N/A                                                                                                                   | N/A                                           | N/A                                                                                                                                                                              |
| 18       | NO                                                                                    | PARTIAL YES                                                              | YES                                                                                                                                                    | N/A                                           | YES                                                                                             | N/A                                                                                                                   | N/A                                           | N/A                                                                                                                                                                              |
| 19       | NO                                                                                    | PARTIAL YES                                                              | NO                                                                                                                                                     | N/A                                           | NO                                                                                              | N/A                                                                                                                   | N/A                                           | N/A                                                                                                                                                                              |
| 20       | NO                                                                                    | PARTIAL YES                                                              | NO                                                                                                                                                     | NO                                            | NO                                                                                              | N/A                                                                                                                   | N/A                                           | N/A                                                                                                                                                                              |
| 21       | NO                                                                                    | PARTIAL YES                                                              | N/A                                                                                                                                                    | NO                                            | NO                                                                                              | N/A                                                                                                                   | N/A                                           | N/A                                                                                                                                                                              |
| 22       | NO                                                                                    | PARTIAL YES                                                              | NO                                                                                                                                                     | N/A                                           | NO                                                                                              | N/A                                                                                                                   | N/A                                           | N/A                                                                                                                                                                              |
| 23       | NO                                                                                    | YES                                                                      | NO                                                                                                                                                     | NO                                            | NO                                                                                              | N/A                                                                                                                   | N/A                                           | N/A                                                                                                                                                                              |
| 24       | NO                                                                                    | PARTIAL YES                                                              | NO                                                                                                                                                     | NO                                            | NO                                                                                              | YES                                                                                                                   | NO                                            | NO                                                                                                                                                                               |

|          | 13                                                                                                                    | 14                                                                                                                                         | 15                                                                                                                                                                                                     | 16                                                                                                                                          |                |
|----------|-----------------------------------------------------------------------------------------------------------------------|--------------------------------------------------------------------------------------------------------------------------------------------|--------------------------------------------------------------------------------------------------------------------------------------------------------------------------------------------------------|---------------------------------------------------------------------------------------------------------------------------------------------|----------------|
| Study ID | Did the review authors account for RoB in individual studies when interpreting/ discussing the results of the review? | Did the review authors provide a satisfactory explanation for, and discussion of, any heterogeneity observed in the results of the review? | If they performed quantitative synthesis did the review authors carry out an adequate investigation of publication bias (small study bias) and discuss its likely impact on the results of the review? | Did the review authors report any potential sources of conflict of interest, including any funding they received for conducting the review? | AMSTAR GRADE   |
| 1        | YES                                                                                                                   | YES                                                                                                                                        | YES                                                                                                                                                                                                    | YES                                                                                                                                         | Low            |
| 2        | YES                                                                                                                   | YES                                                                                                                                        | NO                                                                                                                                                                                                     | YES                                                                                                                                         | Low            |
| 3        | YES                                                                                                                   | YES                                                                                                                                        | YES                                                                                                                                                                                                    | YES                                                                                                                                         | Critically Low |
| 4        | YES                                                                                                                   | YES                                                                                                                                        | NO                                                                                                                                                                                                     | YES                                                                                                                                         | Critically Low |
| 5        | YES                                                                                                                   | YES                                                                                                                                        | YES                                                                                                                                                                                                    | YES                                                                                                                                         | Critically Low |
| 6        | YES                                                                                                                   | YES                                                                                                                                        | YES                                                                                                                                                                                                    | YES                                                                                                                                         | Critically Low |
| 7        | YES                                                                                                                   | YES                                                                                                                                        | YES                                                                                                                                                                                                    | YES                                                                                                                                         | Low            |
| 8        | NO                                                                                                                    | NO                                                                                                                                         | NO                                                                                                                                                                                                     | YES                                                                                                                                         | Critically Low |
| 9        | NO                                                                                                                    | NO                                                                                                                                         | YES                                                                                                                                                                                                    | YES                                                                                                                                         | Critically Low |
| 10       | NO                                                                                                                    | YES                                                                                                                                        | NO                                                                                                                                                                                                     | YES                                                                                                                                         | Critically Low |
| 11       | YES                                                                                                                   | NO                                                                                                                                         | NO                                                                                                                                                                                                     | YES                                                                                                                                         | Critically Low |
| 12       | YES                                                                                                                   | NO                                                                                                                                         | N/A                                                                                                                                                                                                    | YES                                                                                                                                         | Critically Low |
| 13       | YES                                                                                                                   | YES                                                                                                                                        | N/A                                                                                                                                                                                                    | YES                                                                                                                                         | Low            |
| 14       | YES                                                                                                                   | YES                                                                                                                                        | N/A                                                                                                                                                                                                    | YES                                                                                                                                         | Low            |
| 15       | YES                                                                                                                   | YES                                                                                                                                        | N/A                                                                                                                                                                                                    | NO                                                                                                                                          | Low            |
| 16       | YES                                                                                                                   | YES                                                                                                                                        | N/A                                                                                                                                                                                                    | YES                                                                                                                                         | Critically Low |
| 17       | YES                                                                                                                   | YES                                                                                                                                        | N/A                                                                                                                                                                                                    | YES                                                                                                                                         | Critically Low |
| 18       | YES                                                                                                                   | YES                                                                                                                                        | N/A                                                                                                                                                                                                    | YES                                                                                                                                         | Low            |
| 19       | YES                                                                                                                   | YES                                                                                                                                        | N/A                                                                                                                                                                                                    | YES                                                                                                                                         | Critically Low |
| 20       | NO                                                                                                                    | NO                                                                                                                                         | N/A                                                                                                                                                                                                    | YES                                                                                                                                         | Critically Low |
| 21       | NO                                                                                                                    | NO                                                                                                                                         | N/A                                                                                                                                                                                                    | YES                                                                                                                                         | Critically Low |
| 22       | NO                                                                                                                    | NO                                                                                                                                         | N/A                                                                                                                                                                                                    | YES                                                                                                                                         | Critically Low |
| 23       | NO                                                                                                                    | NO                                                                                                                                         | N/A                                                                                                                                                                                                    | YES                                                                                                                                         | Critically Low |
| 24       | NO                                                                                                                    | YES                                                                                                                                        | YES                                                                                                                                                                                                    | NO                                                                                                                                          | Critically Low |
